# Supplementary material for: Direct gas-phase interaction of aryldiazoacetates and dirhodium catalystsElectronic supplementary information (ESI) available: 1H NMR spectra for compounds 1 and 2. See http://www.rsc.org/suppdata/dt/b3/b309809p/
Source: Royal Society of Chemistry journal article supplement (doi:10.1039/b309809p), 2003-01-01

# Supplementary Material

**B309809P (Dalton Transactions)**

# Title: Direct Gas-Phase Interaction of Aryldiazoacetates and Dirhodium Catalysts

**Authors**: Marina A. Petrukhina,* Kristian W. Andreini, Abbas M. Walji and Huw M. L. Davies

---------------------------------------------------------------------------------------------------------------------

NMR spectra were obtained using 300 MHz Varian Gemini spectrometer at 300 MHz for 1H at room temperature. Chemical shifts are reported in ppm relative to CHCl3 (7.24 ppm) for 1H.

Compound (**1**), [Rh2(O2CCMe3)4(CH3OC6H4C(COCH3O)N)2].

1H NMR (CDCl3, 22 C):  0.99 (CH3), 3.71 (CH3O), 3.99 (CH3O), 6.91 (Ar), 7.67 (Ar).


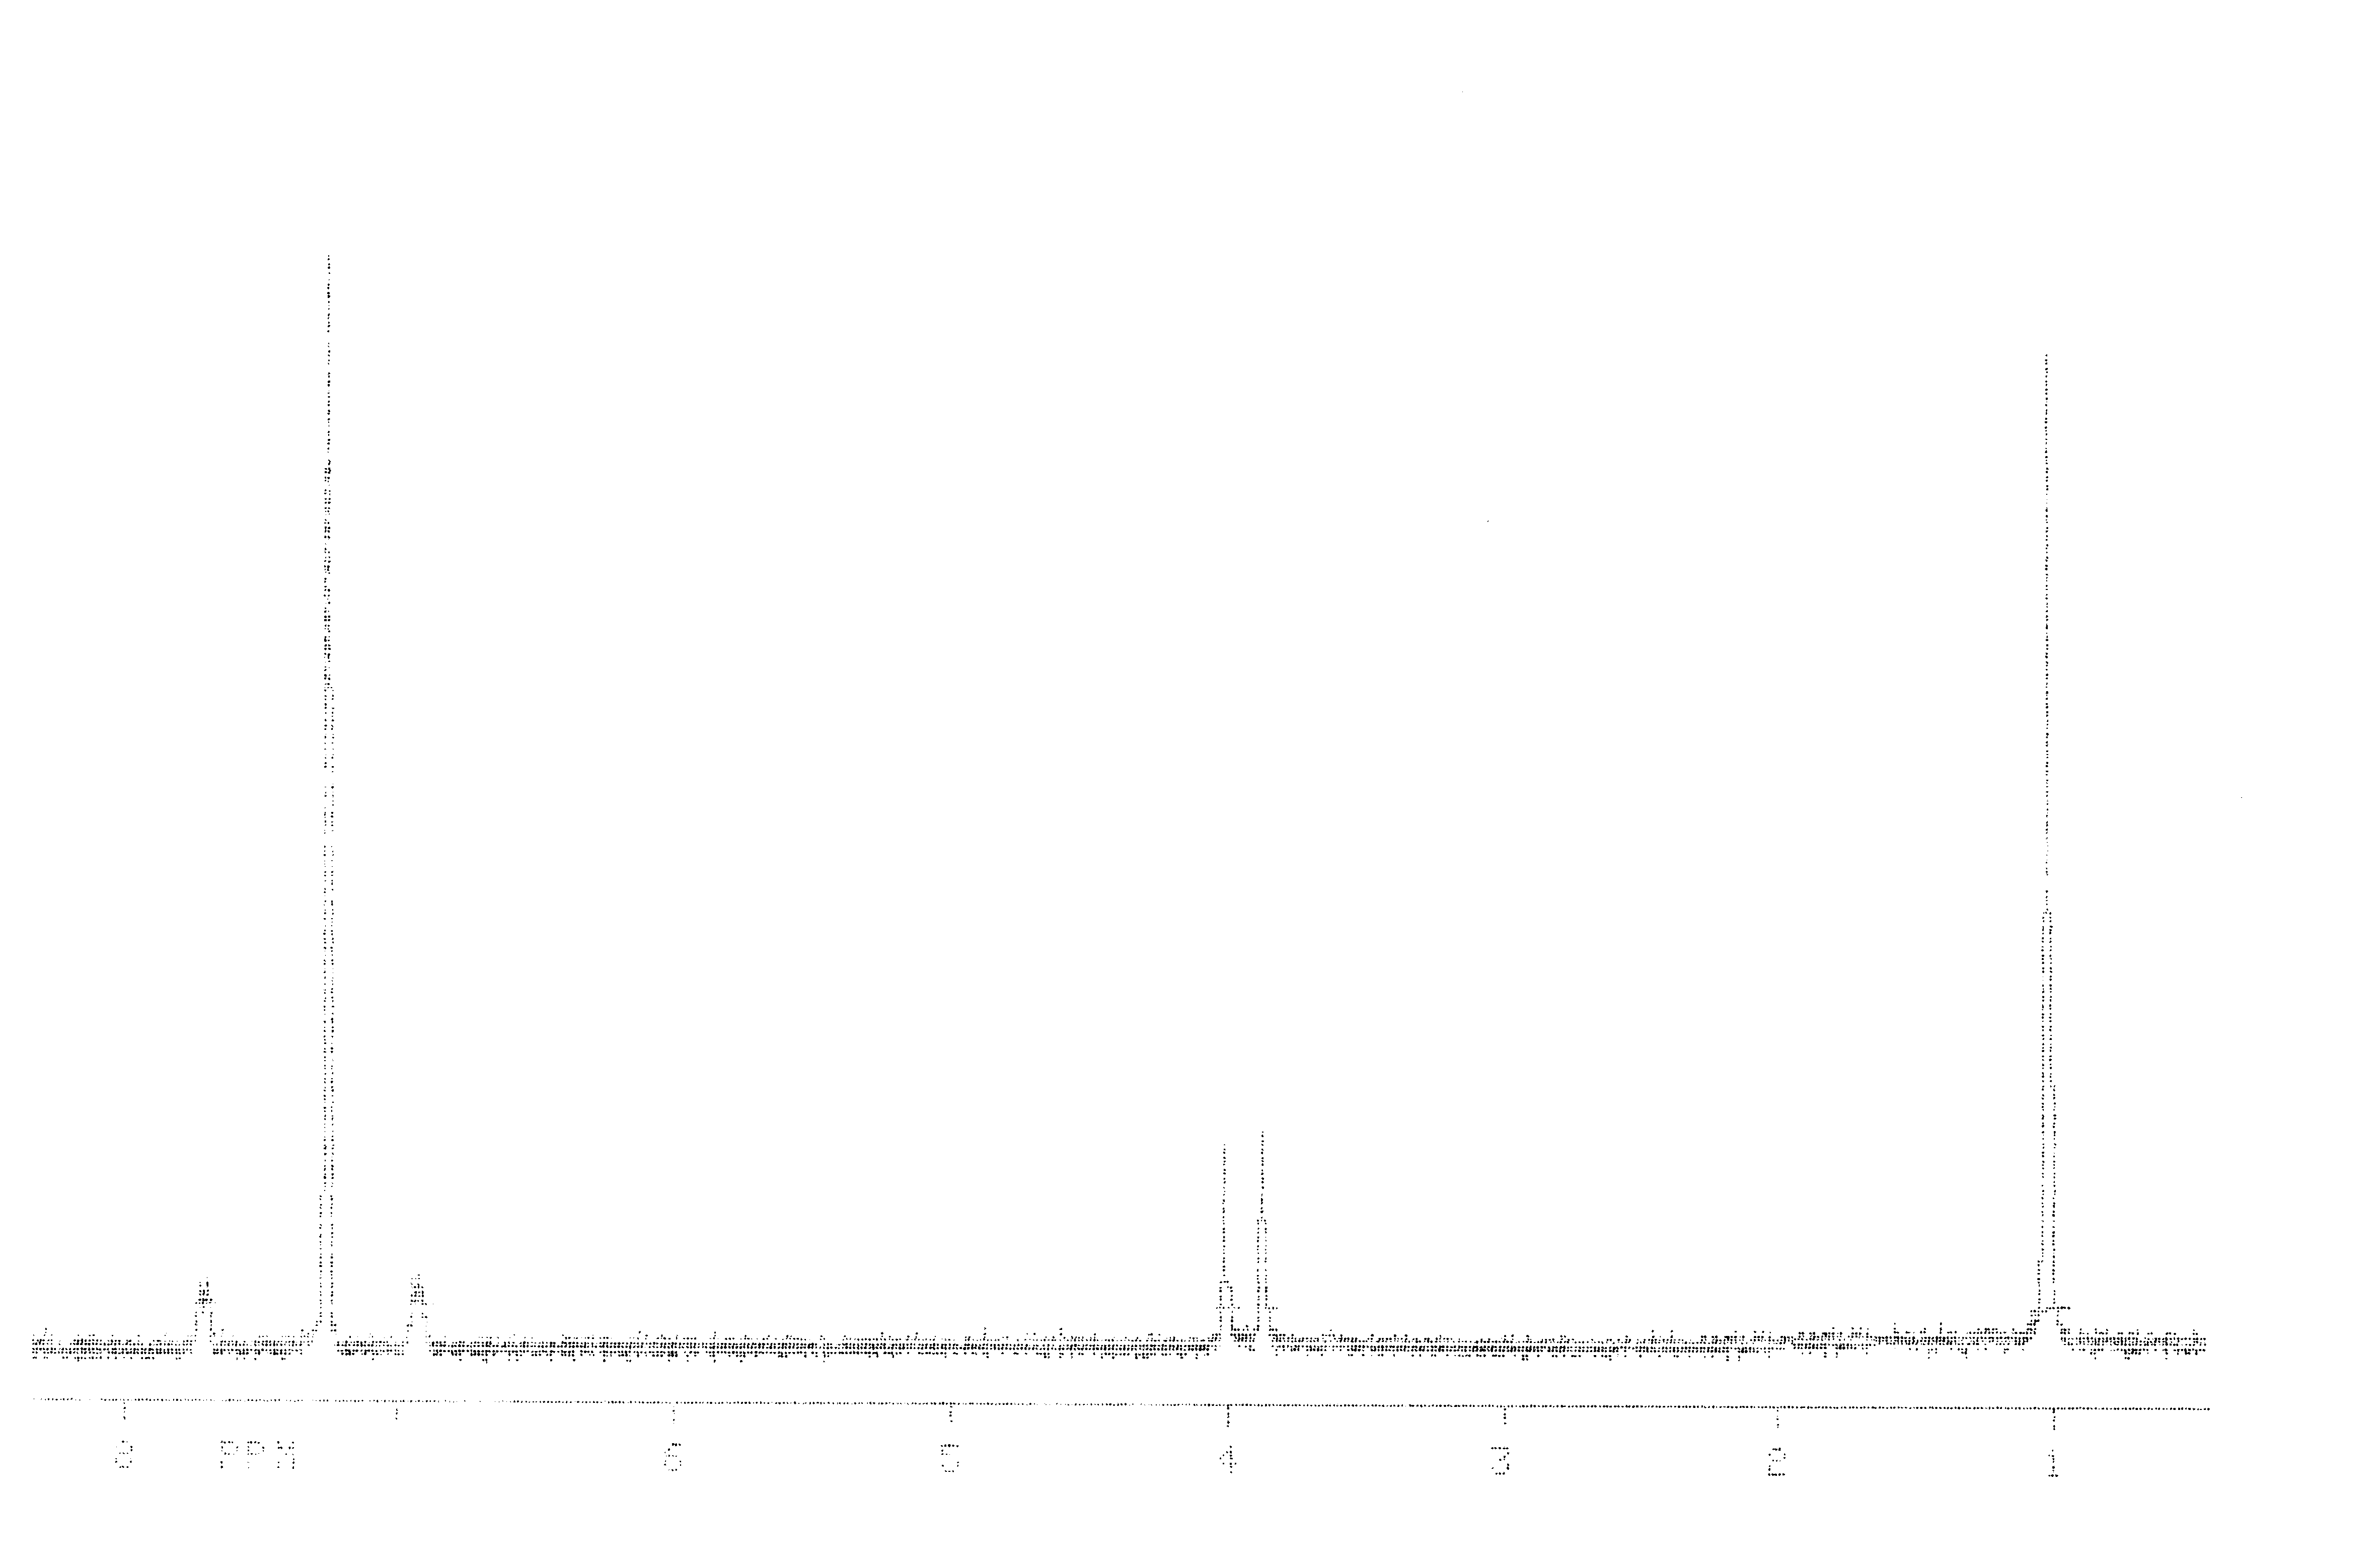


Compound (**2**), [Rh2(O2CCF3)4(CH3OC6H4C(COCH3O))2]

1H NMR (CDCl3, 22 C):  3.79 (CH3O), 3.85 (CH3O), 6.94 (Ar), 7.35 (Ar).


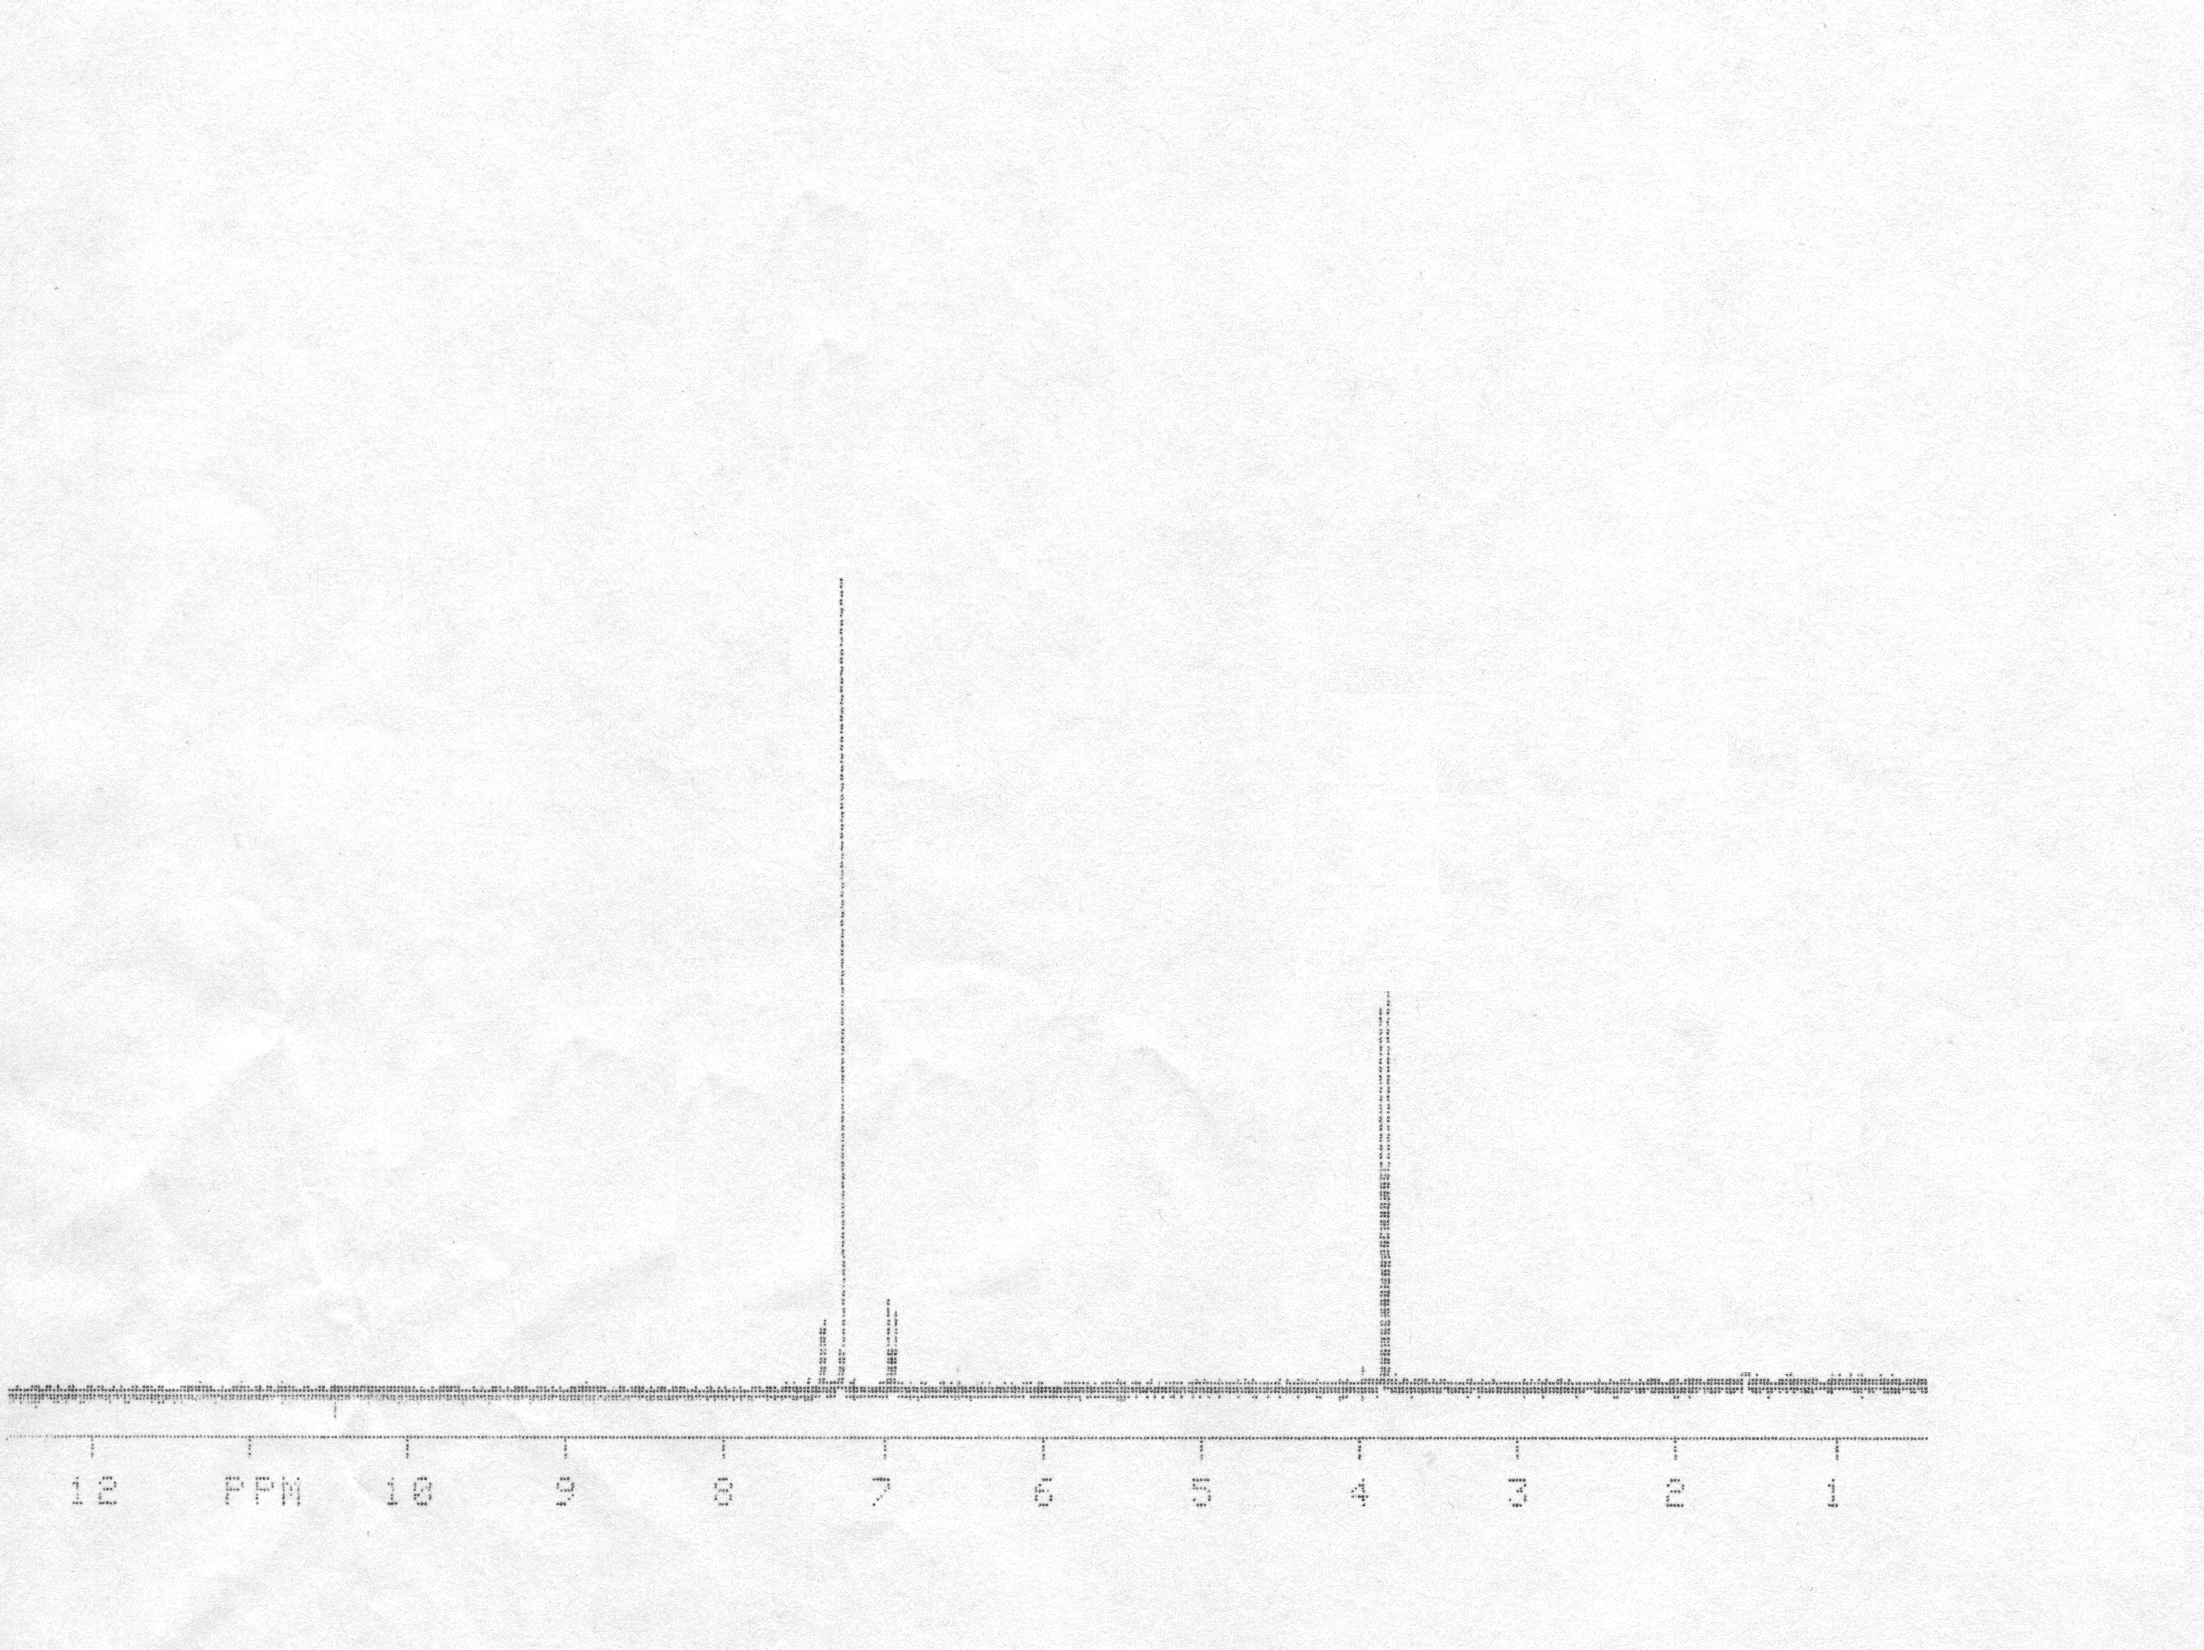

Supplement: b309809p.doc [file b309809p.doc]
